# Supplementary material
Source: publisher site journal article supplement (https://www.dovepress.com/article/232918)

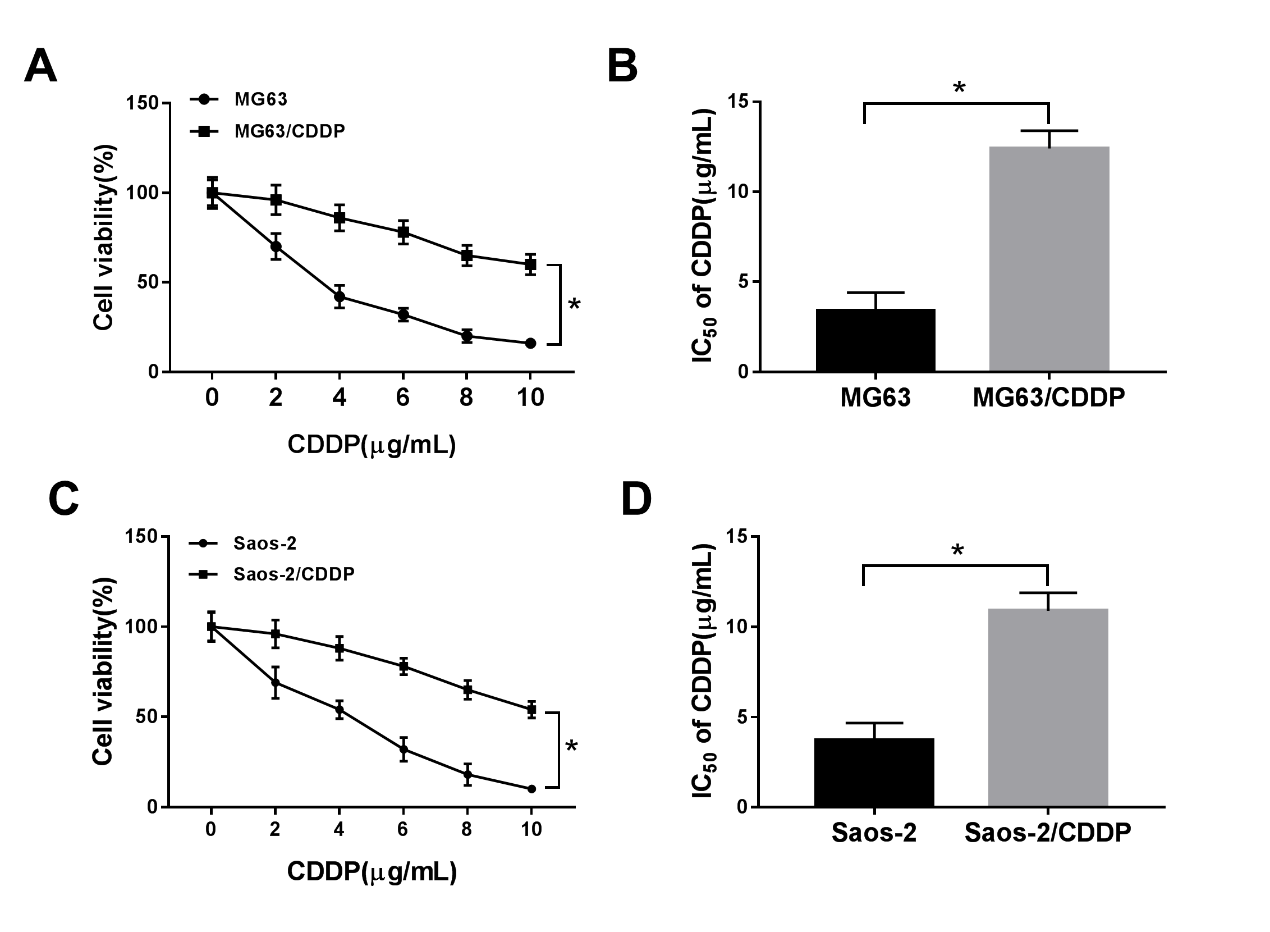


**Fig. S1 The CDDP-resistant cells (MG63/CDDP and Saos-2/CDDP cells) were verified.** **P*<0.05.

Supplement: Supplementary file 1 [file get_supplementary_file.php]
